# Supplementary material
Source: HighWire-hosted journal article supplement (http://www.ajnr.org/highwire/filestream/59944/field_highwire_adjunct_files/0/17-00785.pdf)
Supplement: 17-00785.pdf [file 17-00785.pdf]

**On-line Table: Population characteristics<sup>a</sup>**

| Case No. | Sex (F/M) | Age (Diagnosis to Last Follow-Up, yr) | Symptoms                               | Laterality (R/L) | Affected Segments | No. of (+) | BA/PCA (+) | Ipsilateral PcomA <sup>b</sup> | Stenosis     | Aneurysm (Affected Segments) |                     | Calcium Enhancement | Vessel Wall Enhancement | Ipsilateral A1 <sup>c</sup> | Origin of Ipsilateral                          |          | Ipsilateral Midbrain | PHACE |
|----------|-----------|---------------------------------------|----------------------------------------|------------------|-------------------|------------|------------|--------------------------------|--------------|------------------------------|---------------------|---------------------|-------------------------|-----------------------------|------------------------------------------------|----------|----------------------|-------|
|          |           |                                       |                                        |                  |                   |            |            |                                |              | Stenosis                     | Calcium Enhancement |                     |                         |                             | OA                                             | ICA      |                      |       |
| 1        | F         | 7-14                                  | Sellar mass                            | L                | 7, CS             | 2          | Y          | Dysplasia                      | N            | Y                            | Y                   | Y                   | S&L                     | ICA                         | Hypoplasia                                     | PHACE    |                      |       |
| 2        | F         | 7-13                                  | Headache                               | R                | 5-7, CS, MI       | 5          | Y          | Absence                        | N            | Y                            | N                   | NA                  | S&L                     | IMA                         | Normal                                         | N        |                      |       |
| 3        | M         | 11-12                                 | Head trauma                            | R                | 5-7, CS           | 4          | Y          | Absence                        | N            | Y                            | N                   | Y                   | S&L                     | IMA                         | Hypoplasia                                     | N        |                      |       |
| 4        | F         | 17-22                                 | Both legs, weakness and sensory change | L                | 2-7, CS           | 7          | N          | Normal                         | Y (occluded) | Y                            | N                   | Y                   | Normal                  | ICA                         | Normal                                         | PHACE    |                      |       |
| 5        | F         | 23-24                                 | Right-sided weakness                   | L                | 7, CS             | 2          | Y          | Dysplasia                      | Y            | Y                            | Y                   | Y                   | S&L                     | ICA                         | Hypoplasia                                     | Possible |                      |       |
| 6        | F         | 28-28                                 | Seizure-like episode                   | L                | 3-7, CS, MI       | 7          | Y          | Absence                        | Y            | Y                            | Y                   | NA                  | S&L                     | Stapedial artery            | Hypoplasia                                     | N        |                      |       |
| 7        | F         | 34-34                                 | Headache                               | R                | 7, CS             | 2          | N          | Normal                         | Y            | Y                            | N                   | Y                   | Normal                  | ICA                         | Normal                                         | Possible |                      |       |
| 8        | F         | 39-39                                 | Headache                               | L                | 6, 7, CS          | 3          | Y          | Normal                         | Y (occluded) | N                            | Y                   | NA                  | S&L                     | ICA                         | Normal                                         | N        |                      |       |
| 9        | F         | 42-52                                 | Headache                               | R                | 6, 7, CS          | 3          | Y          | Normal                         | Y            | Y                            | Y                   | NA                  | S&L                     | ICA                         | Hypoplasia                                     | PHACE    |                      |       |
| 10       | F         | 42-42                                 | Headache                               | R                | 7, CS             | 2          | Y          | Dysplasia                      | N            | Y                            | Y                   | NA                  | S&L                     | ICA                         | Hypoplasia (with hypoplasia of the cerebellum) | Possible |                      |       |
| 11       | F         | 45-46                                 | Headache                               | R                | 4-7, CS           | 5          | Y          | Dysplasia                      | N            | Y                            | Y                   | Y                   | Normal                  | ICA                         | Normal                                         | N        |                      |       |
| 12       | F         | 48-48                                 | Aneurysm                               | L                | 6, 7, CS          | 3          | Y          | Normal                         | Y (occluded) | N                            | Y                   | NA                  | S&L                     | ICA                         | Normal                                         | Possible |                      |       |
| 13       | F         | 49-49                                 | Headache                               | R                | 5-7, CS           | 4          | N          | Dysplasia                      | N            | Y                            | Y                   | N                   | Normal                  | ICA                         | Hypoplasia                                     | PHACE    |                      |       |
| 14       | F         | 50-53                                 | Headache                               | R                | 7, CS             | 2          | N          | Normal                         | Y            | Y                            | Y                   | N                   | Absence                 | ICA                         | Normal                                         | N        |                      |       |
| 15       | F         | 51-51                                 | Headache                               | R                | 7, CS             | 2          | Y          | Absence                        | N            | N                            | Y                   | NA                  | Normal                  | IMA                         | Hypoplasia                                     | N        |                      |       |
| 16       | F         | 54-73                                 | Diplopia                               | R                | 3-7, CS           | 6          | N          | Absence                        | Y            | N                            | Y                   | NA                  | Absence                 | ICA                         | Normal                                         | Possible |                      |       |
| 17       | F         | 55-59                                 | Headache                               | L                | 5-7, CS           | 4          | Y          | Absence                        | Y            | Y                            | Y                   | NA                  | S&L                     | ICA                         | Hypoplasia                                     | N        |                      |       |
| 18       | F         | 57-58                                 | Dizziness                              | L                | 4-7, CS           | 5          | Y          | Absence                        | N            | N                            | Y                   | N                   | S&L                     | ICA                         | Normal                                         | N        |                      |       |
| 19       | M         | 72-75                                 | Headache                               | R                | 7, CS             | 2          | Y          | Absence                        | N            | Y                            | Y                   | N                   | S&L                     | ICA                         | Normal                                         | Possible |                      |       |
| 20       | F         | 73-73                                 | Dysarthria                             | L                | 5-7, CS           | 4          | N          | Normal                         | Y            | Y                            | Y                   | NA                  | S&L                     | IMA                         | Normal                                         | Possible |                      |       |

**Note:**—Y indicates yes; N, no; NA, not available; IMA, internal maxillary artery; S&L, small and long; R, right; L, left; (+), positive.

<sup>a</sup> Hypoplasia of the midbrain was not regarded as a criterion of PHACE syndrome.

<sup>b</sup> Dysplasia and absence were both classified as "dysplasia."

<sup>c</sup> S&L and absence were classified as "dysplasia."
